# Supplementary material for: Characterization of patients with atrial fibrillation not treated with oral anticoagulants
Source: PubMed Central journal article supplement — Scand J Prim Health Care. 2014 Dec;32(4):226–31. doi: 10.3109/02813432.2014.984952 (PMC4278389; doi:10.3109/02813432.2014.984952), 2014-12
Supplement: pri-32-226-s001.pdf [file pri-32-226-s001.pdf]

Supplementary material for Johansson C, et al. Characterization of patients with atrial fibrillation not treated with oral anticoagulants. *Scand J Prim Health Care* 2014;32:226–31.

Supplementary Appendix 1. Table of definitions used in the present study.

| Condition                                                                                  | Definition                                                                                                                                                                                                                                                                                                                                                                                                                                                                                                                                                                                                                                                                                  |
|--------------------------------------------------------------------------------------------|---------------------------------------------------------------------------------------------------------------------------------------------------------------------------------------------------------------------------------------------------------------------------------------------------------------------------------------------------------------------------------------------------------------------------------------------------------------------------------------------------------------------------------------------------------------------------------------------------------------------------------------------------------------------------------------------|
| <b>Risk factors for embolism:</b>                                                          |                                                                                                                                                                                                                                                                                                                                                                                                                                                                                                                                                                                                                                                                                             |
| <b>Congestive heart failure</b>                                                            | ICD-10 diagnosis of congestive heart failure or LVEF $\leq$ 40% or an at least moderately decreased left ventricular systolic function                                                                                                                                                                                                                                                                                                                                                                                                                                                                                                                                                      |
| <b>Hypertension</b>                                                                        | ICD-10 diagnosis of hypertension or receiving antihypertensive treatment                                                                                                                                                                                                                                                                                                                                                                                                                                                                                                                                                                                                                    |
| <b>Diabetes mellitus</b>                                                                   | ICD-10 diagnosis of diabetes mellitus or diagnosis of diabetes mellitus stated in the medical record                                                                                                                                                                                                                                                                                                                                                                                                                                                                                                                                                                                        |
| <b>Previous stroke</b>                                                                     | ICD-10 diagnosis of stroke or diagnosis of stroke stated in the medical record                                                                                                                                                                                                                                                                                                                                                                                                                                                                                                                                                                                                              |
| <b>Previous TIA</b>                                                                        | ICD-10 diagnosis of TIA or diagnosis of TIA stated in the medical record                                                                                                                                                                                                                                                                                                                                                                                                                                                                                                                                                                                                                    |
| <b>Previous arterial embolism</b>                                                          | ICD-10 diagnosis of arterial embolism or diagnosis of arterial embolism stated in the medical record                                                                                                                                                                                                                                                                                                                                                                                                                                                                                                                                                                                        |
| <b>Vascular disease</b>                                                                    | Previous myocardial infarction, objectively verified peripheral arterial disease (verified by appropriate imaging or treated with revascularization or amputation), complex aortic plaque or previous surgery for an arterial aneurysm                                                                                                                                                                                                                                                                                                                                                                                                                                                      |
| <b>Presence of a mechanical or biological heart valve</b>                                  | Evidence of presence of a mechanical or biological heart valve stated in the medical record                                                                                                                                                                                                                                                                                                                                                                                                                                                                                                                                                                                                 |
| <b>Chronic venous thromboembolism</b>                                                      | Chronic venous thromboembolism stated in the medical record                                                                                                                                                                                                                                                                                                                                                                                                                                                                                                                                                                                                                                 |
| <b>Risk factors for bleeding:</b>                                                          |                                                                                                                                                                                                                                                                                                                                                                                                                                                                                                                                                                                                                                                                                             |
| <b>Uncontrolled hypertension</b>                                                           | Persistent hypertension with a systolic blood pressure $>$ 180 mm Hg or a diastolic blood pressure $>$ 100 mm Hg                                                                                                                                                                                                                                                                                                                                                                                                                                                                                                                                                                            |
| <b>Renal failure<sup>a</sup></b>                                                           | S-creatinine $\geq$ 200 $\mu$ mol/l, dialysis dependency or previous renal transplantation                                                                                                                                                                                                                                                                                                                                                                                                                                                                                                                                                                                                  |
| <b>Liver failure<sup>a</sup></b>                                                           | Chronic liver disease such as hepatitis, liver cirrhosis or a malignant liver disease, or having a S-total bilirubin $>$ 50 $\mu$ mol/l in combination with S-ALAT $>$ 4.5 $\mu$ kat/l or S-ASAT $>$ 1.8 $\mu$ kat/l or S-ALP $>$ 5.4 $\mu$ kat/l for women and S-ALAT $>$ 6.6 $\mu$ kat/l or S-ASAT $>$ 2.25 $\mu$ kat/l or S-ALP $>$ 5.4 $\mu$ kat/l for men                                                                                                                                                                                                                                                                                                                              |
| <b>Thrombocytopenia<sup>a</sup></b>                                                        | Platelet count less than $100 \times 10^9/l$                                                                                                                                                                                                                                                                                                                                                                                                                                                                                                                                                                                                                                                |
| <b>Anemia<sup>a</sup></b>                                                                  | Haemoglobin value of less than 90 g/l                                                                                                                                                                                                                                                                                                                                                                                                                                                                                                                                                                                                                                                       |
| <b>History of gastrointestinal bleeding</b>                                                | Diagnosis of gastrointestinal bleeding stated in the medical record                                                                                                                                                                                                                                                                                                                                                                                                                                                                                                                                                                                                                         |
| <b>Recent gastrointestinal bleeding</b>                                                    | Gastrointestinal bleeding during the three months preceding 31 <sup>st</sup> December 2010                                                                                                                                                                                                                                                                                                                                                                                                                                                                                                                                                                                                  |
| <b>High risk of falls</b>                                                                  | ICD-10 diagnosis of repeated falls (R29.6) or when high risk of falls was noted as the reason for not recommending OAC treatment                                                                                                                                                                                                                                                                                                                                                                                                                                                                                                                                                            |
| <b>Inability to comply with INR monitoring</b>                                             | Active alcohol abuse or having previously discontinued OAC treatment due to labile INR or when other reasons for inability to comply with INR monitoring were present (e.g. dementia or severe psychiatric disease with no home care services)                                                                                                                                                                                                                                                                                                                                                                                                                                              |
| <b>Predisposition for bleeding</b>                                                         | Thrombocytopenia, anaemia, previous intracerebral or intracranial bleeding, recent or previous gastrointestinal bleeding, bleeding disorders, or other reasons for an increased risk of bleeding such as history of generalized seizures during the past two years                                                                                                                                                                                                                                                                                                                                                                                                                          |
| <b>Other reasons for predisposition for bleeding</b>                                       | Recurrent haemoptysis during the last year, documented high risk of falls, generalized seizures during the past two years, recurrent macroscopic haematuria during the last year, patient with recurrent bladder cancer and previous macroscopic haematuria, chronic thrombocytopenia, aortic dissection, anaemia (B-Hb $<$ 50 g/l) during previous warfarin treatment where the bleeding source was not identified, recurrent epistaxis, menorrhagia, previous severe pancreatic bleeding, previous extracranial vertebral artery bleeding or previous vitreous haemorrhage during treatment with low molecular weight heparin where the patient also was affected by diabetic retinopathy |
| <b>Active alcohol abuse</b>                                                                | Active alcohol abuse stated in the medical records                                                                                                                                                                                                                                                                                                                                                                                                                                                                                                                                                                                                                                          |
| <b>Bleeding disorders</b>                                                                  | Diagnosis of bleeding disorder stated in the medical record                                                                                                                                                                                                                                                                                                                                                                                                                                                                                                                                                                                                                                 |
| <b>Other factors:</b>                                                                      |                                                                                                                                                                                                                                                                                                                                                                                                                                                                                                                                                                                                                                                                                             |
| <b>Dementia or other types of cognitive dysfunction such as severe psychiatric disease</b> | Diagnosis of dementia, cognitive dysfunction, or a severe psychiatric disease stated in the medical record                                                                                                                                                                                                                                                                                                                                                                                                                                                                                                                                                                                  |
| <b>Unsuitable for warfarin treatment</b>                                                   | Patient having declined treatment with warfarin or having had previous adverse effects other than bleeding on warfarin, labile INR during previous warfarin treatment, or inability to comply with INR monitoring                                                                                                                                                                                                                                                                                                                                                                                                                                                                           |

Note: <sup>a</sup> = The biochemical tests for assessing anaemia, thrombocytopenia, renal failure, and liver failure considered were the last analysed before 31<sup>st</sup> December 2010.

## Supplementary Appendix 2. Types of AF.

---

| <b>Type of AF</b>      | <b>Definition</b>                                                                                                                                                                                 |
|------------------------|---------------------------------------------------------------------------------------------------------------------------------------------------------------------------------------------------|
| Isolated episode of AF | Only one ECG-documented episode of AF and all the subsequent ECGs showed sinus rhythm, with or without an identifiable reversible cause. The individual had never been subjected to cardioversion |
| Paroxysmal AF          | More than one ECG-documented episode of AF, the last ECG showed sinus rhythm, and the individual had never been subjected to cardioversion                                                        |
| Permanent AF           | The last ECG showed AF and the individual was not planned to undergo cardioversion                                                                                                                |
| Persistent AF          | The individual had been subjected to cardioversion or was planned to undergo cardioversion after December 31, 2010 and did not fulfil the criteria for permanent AF                               |

---
